# Supplementary material
Source: MDPI journal article supplement (https://www.mdpi.com/2071-1050/15/22/15704)
Supplement: s1 [file s1]

**Table S1a.** Reviewed hydrological regime alteration assessment methods adopted by the 32 EEA member countries and the cooperating countries and their main characteristics (IN: index based on flow indicators; D: descriptive; M: hydrological component only in relation to morphological alteration; QL, Qualitative; Qn, Quantitative)

| a/a | Country                | Hydrological regime alteration assessment | Name                                                                      | Acronym          | Authority                                                                                                                                                                              | Year | Method | quantity and dynamics of flow | connection to groundwaters | Related to EN 14614:2020 | Related to EN 15843:2010 | 3 <sup>rd</sup> RBMP update | Under development |
|-----|------------------------|-------------------------------------------|---------------------------------------------------------------------------|------------------|----------------------------------------------------------------------------------------------------------------------------------------------------------------------------------------|------|--------|-------------------------------|----------------------------|--------------------------|--------------------------|-----------------------------|-------------------|
| 1   | Albania                | No                                        | -                                                                         | -                | -                                                                                                                                                                                      | -    | -      | -                             | -                          | -                        | -                        | -                           | -                 |
| 2   | Austria                | Yes                                       | Austrian Guidance on hydromorphological assessment of rivers              | -                | Bundesministeriums für Land- und Forstwirtschaft, Umwelt und Wasserwirtschaft (Federal Ministry of Agriculture, Forestry, Environment and Water Management of the Republic of Austria) | 2015 | IN     | Qn                            | Qn                         | Yes                      | -                        | -                           | -                 |
| 3   | Belgium                |                                           |                                                                           |                  |                                                                                                                                                                                        |      | -      | -                             |                            |                          |                          |                             |                   |
|     | Brussels               | Yes                                       | évaluation de la QUALité du milieu PHYsique des cours d'eau               | QUALPHY          | -                                                                                                                                                                                      | 1996 | D      | QL                            | QL                         | -                        | -                        | -                           | Yes               |
|     | Flemish                | Yes                                       | meetnet Hydromorfologie                                                   | -                | Flemish Environment Agency                                                                                                                                                             | -    | M      | QL                            | -                          | -                        | -                        | -                           | -                 |
|     | Walloon                | Yes                                       | évaluation de la QUALité du milieu PHYsique des cours d'eau (modified)    | QUALPHY modified | -                                                                                                                                                                                      | 2006 | IN     | Qn                            | Qn                         | Yes                      | -                        | -                           | -                 |
| 4   | Bosnia and Herzegovina | Yes                                       | -                                                                         | -                | Federal Ministry of Environment and Tourism                                                                                                                                            | 2022 | IN     | Qn                            | -                          | Yes                      | Yes                      | -                           | -                 |
| 5   | Bulgaria               | Yes                                       | Flood Attenuation from Reservoirs and Lakes                               | FARL             | Ministry of Environment and Water of Bulgaria                                                                                                                                          | 2023 | D      | Qn                            | -                          | Yes                      | Yes                      | Yes                         | Yes               |
| 6   | Croatia                | Yes                                       | Methodology of monitoring and assessment of hydromorphological indicators | -                | -                                                                                                                                                                                      | 2016 | IN     | Qn                            | -                          | -                        | Yes                      | -                           | -                 |
| 7   | Cyprus                 | No                                        | Integrated Pressure Index                                                 | IPI              | Ministry of Agriculture, Rural Development and Environment, Water Development Department                                                                                               | 2014 | -      | -                             | -                          | -                        | -                        | -                           | -                 |
| 8   | Czech Republic         | Yes                                       | Work procedure for the determination of significant                       | -                | TG Masaryk Water Management Research Institute                                                                                                                                         | 2019 | IN     | Qn                            | -                          | Yes                      | Yes                      | Yes                         | -                 |

| a/a | Country                                      | Hydrological<br>regime alteration<br>assessment | Name                                                                                                                                      | Acronym     | Authority                                                                                           | Year | Method | quantity and<br>dynamics of<br>flow | connection to<br>groundwaters | Related to<br>EN<br>14614:2020 | Related to<br>EN<br>15843:2010 | 3 <sup>rd</sup><br>RBMP<br>update | Under<br>development |
|-----|----------------------------------------------|-------------------------------------------------|-------------------------------------------------------------------------------------------------------------------------------------------|-------------|-----------------------------------------------------------------------------------------------------|------|--------|-------------------------------------|-------------------------------|--------------------------------|--------------------------------|-----------------------------------|----------------------|
|     |                                              |                                                 | effects on morphology and<br>hydrological regime                                                                                          |             |                                                                                                     |      |        |                                     |                               |                                |                                |                                   |                      |
| 9   | Denmark                                      | No                                              | Dansk fysisk indeks (Danish<br>Physical Index)                                                                                            | DFI         | Aarhen University                                                                                   | 2016 | -      | -                                   | -                             | -                              | -                              | -                                 | Yes                  |
| 10  | Estonia                                      | Yes                                             | hüdromorfoloogilise seisundi<br>hinnang-HÜMO hinnang                                                                                      | HYMO EST    | Keskkonnaministeerium<br>-KEM                                                                       | 2019 | IN     | Qn                                  | -                             | -                              | Yes                            | Yes                               | -                    |
| 11  | Finland                                      | Yes                                             | HyMo method (Kevomu-<br>menetelmä)                                                                                                        | -           | The Finnish<br>Environment Institute-<br>SYKE                                                       | 2019 | IN     | Qn                                  | -                             | -                              | -                              | -                                 | Yes                  |
| 12  | France                                       |                                                 |                                                                                                                                           |             |                                                                                                     |      |        |                                     |                               |                                |                                |                                   |                      |
|     | metropolitan<br>France                       | Yes                                             | SYstème Relationnel d’Audit<br>de l’Hydromorphologie des<br>Cours d’Eau – Relational<br>System of watercourse<br>Hydromorphology Auditing | SYRAH-CE    | Not available                                                                                       | 2014 | IN     | Qn                                  | Ql                            | -                              | -                              | -                                 | -                    |
|     | ultra-<br>peripheral<br>regions of<br>France | Yes                                             | Référentiel<br>hydromorphologique ultra-<br>marin/Overseas<br>hydromorphological<br>repository                                            | RHUM        | Not available                                                                                       | 2014 | IN     | Qn                                  | Ql                            | -                              | -                              | -                                 | -                    |
| 13  | Germany                                      | Yes                                             | LAWA-Klassifizierung des<br>Wasserhaushalts von<br>Einzugsgebieten und<br>Wasserkörpern                                                   | -           | Not available                                                                                       | 2017 | IN     | Qn                                  | Qn                            | -                              | -                              | -                                 | -                    |
| 14  | Greece                                       | Yes                                             | Methodology for the<br>determination and the<br>assessment of<br>hydromorphological<br>alteration                                         | -           | Ministry of Environment<br>and Energy-Special<br>Secretariat for Water                              | 2016 | IN     | Qn                                  | -                             | -                              | -                              | -                                 | Yes                  |
| 15  | Hungary                                      | Yes                                             | Assessment of the<br>hydromorphological<br>condition of watercourses<br>and standing waters                                               | -           | General Directorate of<br>Water Management of<br>Hungary-Országos<br>Vízügyi Főigazgatóság<br>(OVF) | 2021 | IN     | Qn                                  | -                             | Yes                            | -                              | Yes                               | -                    |
| 16  | Iceland                                      | Yes                                             | Hydromorphological quality<br>factors of streams and lakes                                                                                | -           | Icelandic Meteorological<br>Office                                                                  | 2021 | IN     | Qn                                  | -                             | -                              | -                              | -                                 | Yes                  |
| 17  | Republic of<br>Ireland                       | Yes                                             | Morphological Quality<br>Index-Ireland                                                                                                    | MQI-Ireland | Environmental<br>Protection Agency                                                                  | -    | M      | Ql                                  | -                             | -                              | -                              | Yes                               | Yes                  |
| 18  | Italy                                        | Yes                                             | Indice di Alterazione del<br>Regime                                                                                                       | IARI        | Not available                                                                                       | 2011 | IN     | Qn                                  | -                             | -                              | -                              | -                                 | -                    |

| a/a | Country            | Hydrological<br>regime alteration<br>assessment | Name                                                                                                                                                                                           | Acronym   | Authority                                                                                    | Year | Method | quantity and<br>dynamics of<br>flow | connection to<br>groundwaters | Related to<br>EN<br>14614:2020 | Related to<br>EN<br>15843:2010 | 3 <sup>rd</sup><br>RBMP<br>update | Under<br>development |
|-----|--------------------|-------------------------------------------------|------------------------------------------------------------------------------------------------------------------------------------------------------------------------------------------------|-----------|----------------------------------------------------------------------------------------------|------|--------|-------------------------------------|-------------------------------|--------------------------------|--------------------------------|-----------------------------------|----------------------|
|     |                    |                                                 | Idrologico/Hydrological<br>Regime Alteration Index                                                                                                                                             |           |                                                                                              |      |        |                                     |                               |                                |                                |                                   |                      |
| 19  | Kosovo             | No                                              | -                                                                                                                                                                                              | -         | -                                                                                            | -    | -      | -                                   | -                             | -                              | -                              | -                                 | -                    |
| 20  | Latvia             | Yes                                             | Summary of methods for<br>determining the significance<br>of loads                                                                                                                             | -         | LVĢMC-Latvian<br>Environmental,<br>Geological and<br>Meteorological Centre                   | 2021 | IN     | Qn                                  | -                             | -                              | Yes                            | Yes                               | -                    |
| 21  | Liechtenstein      | No                                              | Management plan and<br>program of measures<br>according to the Water<br>Framework Directive                                                                                                    | -         | Office for the<br>Environment                                                                | 2019 | -      | -                                   | -                             | -                              | -                              | -                                 | -                    |
| 22  | Lithuania          | Yes                                             | Upės Hidromorfologinis<br>Indeksas-River<br>Hydromorphological index                                                                                                                           | UHMI-RHMI | Ministry of the<br>Environment of the<br>Republic of Lithuania                               | 2021 | IN     | Qn                                  | -                             | Yes                            | -                              | Yes                               | -                    |
| 23  | Luxembourg         | Yes                                             | OWKwater balance                                                                                                                                                                               | -         | Administration de la<br>gestion de l'eau (AGE)-<br>Administration of the<br>water management | 2022 | IN     | Qn                                  | Qn                            | -                              | -                              | Yes                               | -                    |
| 24  | Malta              | No                                              | -                                                                                                                                                                                              | -         | -                                                                                            | -    | -      | -                                   | -                             | -                              | -                              | -                                 | -                    |
| 25  | Montenegro         | Yes                                             | -                                                                                                                                                                                              | -         | Institute for<br>Hydrometeorology and<br>Seismology of<br>Montenegro                         | 2022 | IN     | Qn                                  | -                             | Yes                            | Yes                            | -                                 | -                    |
| 26  | Netherlands        | Yes                                             | Handbook of<br>hydromorphology 2.0-<br>Handboek hydromorfologie<br>2.0                                                                                                                         | -         | -                                                                                            | 2013 | IN     | QI                                  | QI                            | -                              | -                              | -                                 | -                    |
| 27  | North<br>Macedonia | No                                              | -                                                                                                                                                                                              | -         | Ministry of Environment<br>and Spatial Planning                                              | 2021 | -      | -                                   | -                             | -                              | -                              | -                                 | -                    |
| 28  | Norway             | Yes                                             | Proposal for a method for<br>classifying<br>hydromorphological<br>conditions in Norwegian<br>rivers-Forslag til metode for<br>klassifisering av<br>hydromorfologisk tilstand i<br>norske elver | -         | SINTEF                                                                                       | 2018 | IN     | Qn                                  | -                             | Yes                            | Yes                            | -                                 | -                    |
| 29  | Poland             | No                                              | Hydromorfologicznego<br>Indeksu Rzecznego-                                                                                                                                                     | HIR       | -                                                                                            | 2017 | -      | -                                   | -                             | -                              | -                              | -                                 | -                    |

| a/a | Country     | Hydrological<br>regime alteration<br>assessment | Name                                                                                                                                                           | Acronym   | Authority                                                                                   | Year | Method | quantity and<br>dynamics of<br>flow | connection to<br>groundwaters | Related to<br>EN<br>14614:2020 | Related to<br>EN<br>15843:2010 | 3 <sup>rd</sup><br>RBMP<br>update | Under<br>development |
|-----|-------------|-------------------------------------------------|----------------------------------------------------------------------------------------------------------------------------------------------------------------|-----------|---------------------------------------------------------------------------------------------|------|--------|-------------------------------------|-------------------------------|--------------------------------|--------------------------------|-----------------------------------|----------------------|
|     |             |                                                 | Hydromorphological Index<br>for Rivers                                                                                                                         |           |                                                                                             |      |        |                                     |                               |                                |                                |                                   |                      |
| 30  | Portugal    | No                                              | River Habitat<br>Survey/Hydromorphological<br>Quality Index for Large<br>Rivers                                                                                | RHS/IQHGR | -                                                                                           | 2003 | -      | -                                   | -                             | -                              | -                              | -                                 | -                    |
| 31  | Romania     | Yes                                             | Romanian<br>Hydromorphological<br>Assessment methodology                                                                                                       | HYMO_RO   | National Institute of<br>Hydrology and Water<br>Management (NIHWM)                          | 2021 | IN     | Qn                                  | Qn                            | Yes                            | -                              | Yes                               | -                    |
| 32  | Serbia      | No                                              | -                                                                                                                                                              | -         | Environmental<br>Protection Agency-<br>Ministry of<br>Environmental<br>Protection of Serbia | -    | -      | -                                   | -                             | -                              | -                              | -                                 | -                    |
| 33  | Slovakia    | Yes                                             | Hodnotenie<br>hydromorfologickej kvality<br>tokov-Evaluation of the<br>hydromorphological quality<br>of streams                                                | HYMOK     | SHMÚ                                                                                        | 2019 | IN     | Qn                                  | -                             | Yes                            | Yes                            | -                                 | Yes                  |
| 34  | Slovenia    | No                                              | Slovenian<br>hydromorphological<br>assessment methodology                                                                                                      | SIHM      | -                                                                                           | -    | -      | -                                   | -                             | -                              | -                              | -                                 | -                    |
| 35  | Spain       | Yes                                             | Protocol for the<br>hydromorphological<br>characterization of water<br>bodies                                                                                  | -         | Ministry for the<br>Ecological Transition                                                   | 2019 | IN     | Qn                                  | QI                            | -                              | -                              | Yes                               | -                    |
| 36  | Sweden      | Yes                                             | The Swedish Agency for<br>Marine and Water<br>Management regulations on<br>classification and<br>environmental quality<br>standards regarding surface<br>water | -         | Swedish Agency for<br>Marine and Water<br>Management                                        | 2019 | IN     | Qn                                  | -                             | -                              | -                              | -                                 | -                    |
| 37  | Switzerland | Yes                                             | “Hydrology – flow regime”<br>module at level R (region)                                                                                                        | HYDMOD-R  | Federal Office for the<br>Environment (OFEV)                                                | 2011 | IN     | Qn                                  | -                             | -                              | -                              | -                                 | -                    |
| 38  | Turkey      | Yes                                             | -                                                                                                                                                              | -         | Ministry of Agriculture<br>and Forestry                                                     | 2023 | IN     | Qn                                  | QI                            | -                              | -                              | -                                 | Yes                  |

**Table S1b.** Reviewed hydrological regime alteration assessment methods adopted by the 32 EEA member countries and the cooperating countries and their main characteristics (ND: not determined; IN: index based on flow indicators; D: descriptive; M: hydrological component only in relation to morphological alteration; QL, Qualitative; Qn, Quantitative; Component: 1: Average flows, 2: Low flows, 3: High flows; Indicators: see footnote; Indicator group: 1: Magnitude, 2: Frequency, 3: Duration, 4: Timing, 5: Rate of change; Pressures identified: 1: Flow diversion, 2: Abstractions, 3: Hydropeaking, 4: Channel interventions, 5: Large scale interventions; Biological element: 1: Ichthyofauna, 2: Macrozoobenthos/Benthic fauna, 3: Macrophytes)

| a/a | Country                    | Temporal scale | Length (minimum) | River typology | Information source | Reference conditions estimation | Component | Indicator            | Indicator group | Classification scheme              | Pressures identified | Link to ecology | Biological element | Software Tool/Protocol                                        |
|-----|----------------------------|----------------|------------------|----------------|--------------------|---------------------------------|-----------|----------------------|-----------------|------------------------------------|----------------------|-----------------|--------------------|---------------------------------------------------------------|
| 1   | Albania                    | -              | -                | -              | -                  | -                               | -         | -                    | -               | -                                  | -                    | -               | -                  | -                                                             |
| 2   | Austria                    | D, M, A        | ND               | Yes            | 1                  | ND                              | 1, 2      | Qm, Qal, Qdl         | 1               | 2-class                            | 2, 3, 4              | Yes             | 1                  | HyDaMS (not publicly available)                               |
| 3   | Belgium                    |                |                  |                |                    |                                 |           |                      |                 |                                    |                      |                 |                    |                                                               |
|     | Brussels                   | ND             | ND               | ND             | ND                 | ND                              | ND        | ND                   | ND              | ND                                 | ND                   | ND              | ND                 | -                                                             |
|     | Flanders                   | ND             | ND               | ND             | ND                 | ND                              | ND        | ND                   | ND              | ND                                 | ND                   | ND              | ND                 | -                                                             |
|     | Wallonia                   | ND             | ND               | ND             | 5                  | ND                              | ND        | D                    | 1               | 3-class/2-class                    | 1, 2, 4              | ND              | ND                 | -                                                             |
| 4   | Bosnia and Herzegovina     | H, D           | ND               | ND             | 1, 3, 4            | ND                              | 1         | Qd, Qs               | 1               | 5-class                            | 1, 2, 3, 4           | ND              | ND                 | -                                                             |
| 5   | Bulgaria                   | ND             | ND               | ND             | ND                 | ND                              | ND        | ND                   | ND              | 5-class                            | 1, 3, 5              | ND              | ND                 | -                                                             |
| 6   | Croatia                    | H, D           | ND               | ND             | 1, 3, 4, 5         | 1                               | 1, 2, 3   | Qd, N%               | 1               | 5-class/3-class                    | 1, 2, 3, 4, 5        | ND              | ND                 | -                                                             |
| 7   | Cyprus                     |                | -                | -              | -                  | -                               | -         | -                    | -               | -                                  | -                    | -               | -                  | -                                                             |
| 8   | Czech Republic             | M              | 15y              | ND             | 1, 2               | 3                               | 1, 2, 3   | Qa                   | 1, 4, 5         | 5-class                            | 1, 2, 3, 4           | Yes             | 1, 2, 3            | -                                                             |
| 9   | Denmark                    | -              | -                | -              | -                  | -                               | -         | -                    | -               | -                                  | -                    | -               | -                  | -                                                             |
| 10  | Estonia                    | A              | ND               | ND             | 1, 4               | ND                              | 1         | Qa                   | 1               | 5-class                            | 2, 5                 | ND              | ND                 | -                                                             |
| 11  | Finland                    | D              | 10y              | Yes            | 1                  | ND                              | 1, 3      | MQ, HQvrk-NQvrk, MHQ | 1, 2, 4         | 5-class                            | 2, 4, 5              | Yes             | 1, 2               | -                                                             |
| 12  | France                     |                |                  |                |                    |                                 |           |                      |                 |                                    |                      |                 |                    |                                                               |
|     | metropolitan France        | D              | ND               | Yes            | 1, 3, 4            | 2                               | 2, 3      | ND                   | 1               | 3-class low flow/4-class high flow | 2, 5                 | ND              | ND                 | AURAH-CE (AUDIT RAPIDE de l'Hydromorphologie des Cours d'Eau) |
|     | overseas regions of France | D              | ND               | Yes            | 1, 3, 4            | 2                               | 1, 2, 3   | ND                   | 1, 2, 3, 4      | 3-class                            | 1, 2, 5              | ND              | ND                 | -                                                             |
| 13  | Germany                    | ND             | ND               | ND             | 1, 4               | 2                               | 1, 2      | Qa, Qal              | 1               | 5-class                            | 1, 2, 3, 4, 5        | ND              | ND                 | -                                                             |

| a/a | Country             | Temporal scale | Length (minimum)                    | River typology | Information source | Reference conditions estimation | Component | Indicator                               | Indicator group | Classification scheme   | Pressures identified | Link to ecology | Biological element | Software Tool/Protocol   |
|-----|---------------------|----------------|-------------------------------------|----------------|--------------------|---------------------------------|-----------|-----------------------------------------|-----------------|-------------------------|----------------------|-----------------|--------------------|--------------------------|
| 14  | Greece              | M              | ND                                  | ND             | 1                  | 4                               | 1, 2, 3   | Qmm, Qmmax, Qmmin                       | 1               | 5-class                 | 1, 2, 4, 5           | No              | No                 | -                        |
| 15  | Hungary             | M              | 30y                                 | Yes            | 1                  | ND                              | 1, 2, 3   | Qaug80%, La, Ld                         | 1, 3            | 5-class/3-class         | 1, 2, 3              | Yes             | 1, 2               | -                        |
| 16  | Iceland             | H, D, W, A     | 10y                                 | Yes            | 1, 2               | 1, 3, 5                         | 1, 2, 3   | Qam, Qwmls/Q95, Qwmlw/Q95, F2, F10, F33 | 1, 2            | 5-class                 | 1, 3, 4              | Yes             | ND                 | COSH-Tool                |
| 17  | Republic of Ireland | ND             | ND                                  | ND             | ND                 | ND                              | ND        | ND                                      | ND              | ND                      | ND                   | ND              | ND                 |                          |
| 18  | Italy               | D, M           | 5y (current), 20y (natural flow)    | ND             | 1, 2               | 1, 3                            | 1, 2, 3   | Q25, Q75                                | 1, 2, 3, 4, 5   | 3-class                 | 1, 2, 5              | No              | No                 | IHA                      |
| 19  | Kosovo              | -              | -                                   | -              | -                  | -                               | -         | -                                       | -               | -                       | -                    | -               | -                  | -                        |
| 20  | Latvia              | ND             | 30y                                 | ND             | 1                  | 1, 5 (maps)                     | 1, 2      | ND                                      | 1               | 3-class                 | ND                   | No              | No                 | -                        |
| 21  | Liechtenstein       | -              | -                                   | -              | -                  | -                               | -         | -                                       | -               | -                       | -                    | -               | -                  | -                        |
| 22  | Lithuania           | ND             | ND                                  | ND             | ND                 | ND                              | 1, 2      | ND                                      | 1               | 4-class                 | 1, 2, 3, 4           | No              | No                 | -                        |
| 23  | Luxembourg          | ND             | ND                                  | ND             | 1, 4               | 2                               | 1, 2      | Qa, Qal                                 | 1               | 5-class                 | 1, 2, 3, 4, 5        | No              | No                 | HyMo2020 GIS Application |
| 24  | Malta               | -              | -                                   | -              | -                  | -                               | -         | -                                       | -               | -                       | -                    | -               | -                  | -                        |
| 25  | Montenegro          | H, D           | ND                                  | ND             | 1, 3, 4            | ND                              | 1         | Qd, Qs                                  | 1               | 5-class                 | 1, 2, 3, 4           | No              | -                  | -                        |
| 26  | Netherlands         | H              | ND                                  | Yes            | 1, 2, 4            | ND                              | 1         | Qd                                      | 1, 2, 5         | 2-class/3-class/5-class | ND                   | No              | No                 | -                        |
| 27  | North Macedonia     | -              | -                                   | -              | -                  | -                               | -         | -                                       | -               | -                       | -                    | -               | -                  | -                        |
| 28  | Norway              | H, D, W, A     | 20y (10 before-10 after regulation) | ND             | 1, 2               | 1, 3, 5                         | 1, 2, 3   | Qam, Qwmls/Q95, Qwmlw/Q95, F2, F10, F33 | 1, 2            | 5-class/3-class         | 1, 3, 4              | Yes             | ND                 | COSH-Tool                |
| 29  | Poland              | -              | -                                   | -              | -                  | -                               | -         | -                                       | -               | -                       | -                    | -               | -                  | -                        |
| 30  | Portugal            | -              | -                                   | -              | -                  | -                               | -         | -                                       | -               | -                       | -                    | -               | -                  | -                        |
| 31  | Romania             | A              | 1y, 6y                              | ND             | 1, 2               | 1, 4                            | 1, 3      | Qa, Qac, Qmc                            | 1               | 5-class                 | 1, 2, 3              | Yes             | ND                 | -                        |

| a/a | Country     | Temporal scale | Length (minimum) | River typology | Information source | Reference conditions estimation | Component | Indicator                                      | Indicator group | Classification scheme | Pressures identified | Link to ecology | Biological element | Software Tool/Protocol |
|-----|-------------|----------------|------------------|----------------|--------------------|---------------------------------|-----------|------------------------------------------------|-----------------|-----------------------|----------------------|-----------------|--------------------|------------------------|
| 32  | Serbia      | -              | -                | -              | -                  | -                               | -         | -                                              | -               | -                     | -                    | -               | -                  | -                      |
| 33  | Slovakia    | D, M           | 20y              | Yes            | 1                  | 1                               | 1, 2, 3   | Q5, Q10, Q20, Q50, Q355                        | 1, 2, 3, 5      | 3-class               | 1, 2, 3, 4           | No              | No                 | -                      |
| 34  | Slovenia    | -              | -                | -              | -                  | -                               | -         | -                                              | -               | -                     | -                    | -               | -                  | -                      |
| 35  | Spain       | M, A           | Since 1980       | Yes            | 1                  | 1, 3                            | 1, 2, 3   | Qm, Qa, Qdmax, N                               | 1, 2, 3, 4, 5   | 4-class               | 1, 2, 3, 4, 5        | No              | No                 | IAHRIS                 |
| 36  | Sweden      | ND             | ND               | ND             | ND                 | ND                              | 1         | Qsp, Qvd, Qdrch, WLdrch                        | 1               | 5-class               | ND                   | No              | No                 | -                      |
| 37  | Switzerland | D, M, A        | 5-10y            | ND             | 1, 4               | ND                              | 1, 2, 3   | Qm, Qa, Pk, Qdmax, Qd, Q347, Qdmax, Qdmin, etc | 1, 2, 4, 5      | 5-class               | ND                   | No              | No                 | HYDMOD-FIT             |
| 38  | Turkey      | M, A           | ND               | ND             | 1, 4               | ND                              | 1         | Qa, Qam, Da                                    | 1, 5            | 5-class               | 3, 4                 | No              | No                 | -                      |

Indicators:

|       |                            |
|-------|----------------------------|
| Qm    | average monthly flow       |
| Qa    | average annual flow        |
| Qam   | median annual flow         |
| Qal   | average annual low flow    |
| Qd    | average daily flow         |
| Qdl   | average daily low flow     |
| Qdmax | average daily maximum flow |
| Qdmin | average daily minimum flow |
| Qmm   | median monthly flow        |
| Qmmax | maximum monthly flow       |
| Qmmin | minimum monthly flow       |
| Qs    | average seasonal flow      |

|             |                                                                                                   |
|-------------|---------------------------------------------------------------------------------------------------|
| Qwmls       | 7-day period with the lowest median water flow-summer                                             |
| Qwmlw       | 7-day period with the lowest median water flow-winter                                             |
| Q95         | the level of flow at the point of measurement exceeded for 95% of the time over a ten year period |
| Qac         | Average flow consumed                                                                             |
| Qmc         | Maximum captured flow                                                                             |
| N           | Number of times the maximum ordinary flood has been exceeded since October 1980                   |
| DM          | Median flow                                                                                       |
| DCE         | characteristic low flow                                                                           |
| DCC         | characteristic flood flow                                                                         |
| N%          | Percentage (%) of days in which the flow is different from the natural                            |
| MQ          | Change in mean flow                                                                               |
| HQvrk-NQvrk | Change in the daily variation of the flow                                                         |
| MHQ         | Flood peaks transition or middle overflowgrowth                                                   |
| Qaug80%     | 80% of the average flow in August                                                                 |
| La          | average level of peaking                                                                          |
| Ld          | length of effect of peaking                                                                       |
| F2          | Flood of 2-year return period                                                                     |
| F10         | Flood of 10-year return period                                                                    |
| F33         | Flood of 33-year return period                                                                    |
| Qsp         | Specific flow effect                                                                              |
| Qvd         | Volume deviation                                                                                  |
| Qdrch       | relative deviation rate of change of flow                                                         |
| WLdrch      | rate of change of the water level                                                                 |
| Pk          | Parde coefficients                                                                                |



Da      average water depth

**Table S2a.** Reviewed global hydrological regime alteration assessment methods (IN: index based on flow indicators; D: descriptive; M: hydrological component only in relation to morphological alteration; QL, Qualitative; Qn, Quantitative)

| a/a | Country                         | Name                                                | Acronym  | Authority                                                            | Year | Method | quantity and dynamics of flow |
|-----|---------------------------------|-----------------------------------------------------|----------|----------------------------------------------------------------------|------|--------|-------------------------------|
| 1   | USA                             | Range of Variability Approach                       | RVA      | US Nature Conservancy                                                | 1996 | IN     | Qn                            |
| 2   | Scotland                        | Dundee Hydrological Regime Alteration Method        | DHRAM    | Sniffer-Scotland & Northern Ireland Forum for Environmental Research | 2000 | IN     | Qn                            |
| 3   | Spain                           | Index of Global Alteration                          | IGA      | -                                                                    | 2010 | IN     | Qn                            |
| 4   | South Africa                    | Hydrological Driver Assessment Index                | HAI      | Department of Water and Sanitation, Republic of South Africa         | 2016 | IN     | Qn                            |
| 5   | Taiwan                          | Histogram Matching Approach                         | HMA      | -                                                                    | 2008 | IN     | Qn                            |
| 6   | China                           | Histogram Comparison Approach                       | HCA      | -                                                                    | 2017 | IN     | Qn                            |
| 7   | Finland                         | River Impact Index                                  | RI       | -                                                                    | 2014 | IN     | Qn                            |
| 8   | Australia                       | River Disturbance Index                             | RDI      | -                                                                    | 2002 | IN     | Qn                            |
| 9   | Victoria, Australia             | Index of Stream Condition                           | ISC      | Centre for Environmental Applied Hydrology, University of Melbourne  | 1999 | IN     | Qn                            |
| 10  | Australia                       | Hydrological Disturbance Index                      | HDI      | National Land and Water Resources Audit Office                       | 2001 | IN     | Qn                            |
| 11  | Victoria, Australia             | Flow Stress Ranking                                 | FSR      | Department of Sustainability and Environment                         | 2005 | IN     | Qn                            |
| 12  | Murray-Darling Basin, Australia | Sustainable Rivers Hydrology Index                  | SR-HI    | Murray-Darling Basin Commission                                      | 2004 | IN     | Qn                            |
| 13  | Tasmania, Australia             | Hydrology Sub-Index Tasmanian River Condition Index | HSI-TRCI | NRM South                                                            | 2009 | IN     | Qn                            |
| 14  | China                           | Chinese Hydrology and Water Resources Index         | HD       | -                                                                    | 2011 | IN     | Qn                            |
| 15  | China                           | Index of Flow Health                                | IFH      | -                                                                    | 2012 | IN     | Qn                            |
| 16  | Italy                           | Index of Daily Hydrological Alteration              | IDHA     | -                                                                    | 2012 | IN     | Qn                            |
| 17  | China                           | Alteration of the HYT order                         | HYT      | -                                                                    | 2015 | IN     | Qn                            |
| 18  | South Korea                     | Eco-index                                           | -        | -                                                                    | 2014 | IN     | Qn                            |
| 19  | Pan-European                    | Ecological Risk due to Flow Alteration              | ERFA     | -                                                                    | 2014 | IN     | Qn                            |

| a/a | Country                  | Name                                                                                                                         | Acronym | Authority                                        | Year | Method | quantity and dynamics of flow |
|-----|--------------------------|------------------------------------------------------------------------------------------------------------------------------|---------|--------------------------------------------------|------|--------|-------------------------------|
| 20  | -                        | River Regulation Index                                                                                                       | RRI     | -                                                | 2014 | IN     | Qn                            |
| 21  | USA                      | Hydroecological Integrity Assessment Process                                                                                 | HIP     | USGS                                             | 2006 | IN     | Qn                            |
| 22  | USA                      | Effective Degree of Regulation                                                                                               | EDOR    | -                                                | 2017 | IN     | Qn                            |
| 23  | England & Wales          | The Water Framework Directive (Standards and Classification) Directions (England and Wales) 2015                             | -       | Environment Agency                               | 2015 | IN     | Qn                            |
| 24  | North Ireland            | The Water Framework Directive (Classification, Priority Substances and Shellfish Waters) Regulations (Northern Ireland) 2015 | -       | Department of the Environment (Northern Ireland) | 2015 | IN     | Qn                            |
| 25  | Scotland                 | The Scotland River Basin District (Standards) Directions 2014                                                                | -       | Scottish Environment Protection Agency           | 2014 | IN     | Qn                            |
| 26  | -                        | Hydro-Morphological Quality Index                                                                                            | HMQUI   | -                                                | 2016 | IN     | Qn/QI                         |
| 27  | United Kingdom           | Lotic-invertebrate Index for Flow Evaluation                                                                                 | LIFE    | -                                                | 1999 | IN     | Qn                            |
| 28  | Canada                   | Canadian Ecological Flow Index                                                                                               | CEFI    | -                                                | 2011 | IN     | Qn                            |
| 29  | Greece                   | Hellenic Flow Index                                                                                                          | ELF     | -                                                | 2020 | IN     | Qn                            |
| 30  | USA                      | Flow duration curves                                                                                                         | FDC     | -                                                | 2007 | IN     | QI                            |
| 31  | USA                      | Hydrologic Condition Assessment                                                                                              | HCA     | -                                                | 2000 | IN     | QI                            |
| 32  | Canada                   | Flow Duration Curve Index                                                                                                    | FDCI    | -                                                | 2013 | IN     | Qn                            |
| 33  | Southern California, USA | Hydrologic Alteration Index                                                                                                  | HAI     | -                                                | 2017 | IN     | Qn                            |
| 34  | EU                       | Hydrological status                                                                                                          | HS      | -                                                | 2011 | IN     | Qn                            |
| 35  | Mexico                   | Mexican standard-Hydrologic alteration indexes                                                                               | HAI     | -                                                | 2012 | IN     | Qn                            |
| 36  | -                        | Hydropeaking                                                                                                                 | HP      | -                                                | 2014 | IN     | Qn                            |
| 37  | Turkey                   | Hydrology sub-index                                                                                                          | HI      | -                                                | 2021 | IN     | Qn                            |
| 38  | -                        | Dynamic Flow Alteration Indices                                                                                              | DFAI    | -                                                | 2022 | IN     | Qn                            |

**Table S2b.** Reviewed global hydrological regime alteration assessment methods (ND: not determined; Component: 1: Average flows, 2: Low flows, 3: High flows; Indicator group: 1: Magnitude, 2: Frequency, 3: Duration, 4: Timing, 5: Rate of change; Pressures identified: 1: Flow diversion, 2: Abstractions, 3: Hydropeaking, 4: Channel interventions, 5: Large scale interventions; Biological element: 1: Ichthyofauna, 2: Macrozoobenthos/Benthic fauna, 3: Macrophytes)

| a/a | Acronym | Temporal scale | Length (minimum) | River typology | Information source | Reference conditions estimation | Classification scheme | Component | Indicator                                                                                                                                                                 | Indicator group | Pressures identified | Link to ecology | Biological element | Tool   |
|-----|---------|----------------|------------------|----------------|--------------------|---------------------------------|-----------------------|-----------|---------------------------------------------------------------------------------------------------------------------------------------------------------------------------|-----------------|----------------------|-----------------|--------------------|--------|
| 1   | RVA     | D              | 20y              | No             | 1, 2               | 1, 2, 3, 4, 5                   | 3-class               | 1, 2, 3   | 32 Q parameters                                                                                                                                                           | 1, 2, 3, 4, 5   | ND                   | No              | No                 | IHA    |
| 2   | DHRAM   | D              | 20y              | No             | 1, 2               | 1, 3                            | 5-class               | 1, 2, 3   | 32 Q parameters                                                                                                                                                           | 1, 2, 3, 4, 5   | ND                   | No              | No                 | IHA    |
| 3   | IGA     | D, M           | 15y              | No             | 1, 2               | 1, 3                            | 5-class               | 1, 2, 3   | 32 Q parameters, 21 indexes                                                                                                                                               | 1, 2, 3, 4, 5   | ND                   | No              | No                 | IAHRIS |
| 4   | HAI     | D, M           | ND               | No             | 1, 2               | 1, 3                            | 6-class               | 1, 2, 3   | 70% percentile, ratio from the max to min mean baseflow month                                                                                                             | 1, 2, 3, 4, 5   | ND                   | No              | No                 |        |
| 5   | HMA     | D, M           | 20y              | No             | 1, 2               | 1, 3                            | 2-class               | 1, 2, 3   | 32 Q parameters                                                                                                                                                           | 1, 2, 3, 4, 5   | ND                   | No              | No                 |        |
| 6   | HCA     | D, M           | 20y              | No             | 1, 2               | 1, 3                            | ND                    | 1, 2, 3   | 32 Q parameters                                                                                                                                                           | 1, 2, 3, 4, 5   | ND                   | No              | No                 |        |
| 7   | RI      | M              | ND               | No             | ND                 | ND                              | 5-class               | 1         | MIF (Magnitude Impact Factor), TIF (Timing Impact Factor) and VIF (Variation Impact Factor)                                                                               | 1, 4, 5         | ND                   | No              | No                 |        |
| 8   | RDI     | ND             | ND               | No             | 4                  | ND                              | 8-class               | ND        | ND                                                                                                                                                                        | ND              | ND                   | No              | No                 | GIS    |
| 9   | ISC     | M              | 5y minimum       | No             | 1, 2               | 2, 3                            | 5-class               | ND        | Amended Annual Proportional Flow Deviation; Daily flow variation due to change of catchment permeability; Daily flow variation due to peaking hydroelectricity generation | ND              | 1, 3, 5              | Yes             | 2                  |        |
| 10  | HDI     | M              | ND               | No             | 1, 2               | 1, 2                            | 5-class               | 1, 2, 3   | mean annual flow index, flow duration curve difference index, seasonal amplitude index (SA), seasonal period index (SP)                                                   | 1, 4, 5         | 1, 2                 | No              | No                 |        |
| 11  | FSR     | D, M           | 15y minimum      | No             | 1, 2, 3, 4, 5      | 2, 3                            | ND                    | 1, 2, 3   | Low Flow Index, High Flow Index, Proportion of Zero Flow Index, Seasonal Period Index                                                                                     | 1, 4            | ND                   | No              | No                 |        |

| a/a | Acronym  | Temporal scale | Length (minimum) | River typology | Information source | Reference conditions estimation | Classification scheme | Component | Indicator                                                                                                                                                                                                                                                                                                                                   | Indicator group | Pressures identified | Link to ecology | Biological element | Tool                        |
|-----|----------|----------------|------------------|----------------|--------------------|---------------------------------|-----------------------|-----------|---------------------------------------------------------------------------------------------------------------------------------------------------------------------------------------------------------------------------------------------------------------------------------------------------------------------------------------------|-----------------|----------------------|-----------------|--------------------|-----------------------------|
| 12  | SR-HI    | M              | 15y              | No             | 1, 2               | 3                               | 5-class               | 1, 2, 3   | High-Flow Events, HFE, Low- and Zero-Flow Events, LZFE, Variability, V, Seasonality, S, Gross Volume, GV                                                                                                                                                                                                                                    | 1, 4, 5         | ND                   | No              | No                 |                             |
| 13  | HSI-TRCI | D              | 15y minimum      | No             | 1, 2               | 3                               | 5-class               | 1, 2, 3   | Mean Annual Flow Index (MAF), Flow Duration index (FD), Variation Index (CV), Seasonal Amplitude Index (SA), Seasonal Period Index (SP), High Flow Index (HF), High Flow Spells Index (HFS), Low Flow Index (LF), Low Flow Spells Index (LFS), Proportion of Zero, Flows Index (PZ), Overbank Flows Index (OF), Overbank Spells Index (OFS) | 1, 2, 3, 4, 5   | ND                   | No              | No                 |                             |
| 14  | HD       | D, M           | ND               | No             | 1, 2               | 3                               | 8-class               | 1, 2      | Amended Annual Proportion of Flow Deviation indicator (AAPFD)                                                                                                                                                                                                                                                                               | 1               | ND                   | No              | No                 |                             |
| 15  | IFH      | D, M           | 10y              | No             | 1, 2               | 3                               | 5-class               | 1, 2, 3   | High Flow (HF), Low Flow (LF), Highest Monthly (HM), Lowest Monthly (LM), Persistently Higher (PH), Persistently Lower (PL), Persistently Very Low (PVL), Seasonality Flow Shift (SFS) and Flood Flow Interval (FFI).                                                                                                                       | 1, 2, 3, 4, 5   | ND                   | No              | No                 | Software Flow Health v3.0.0 |
| 16  | IDHA     | D              | ND               | No             | 1, 2               | 3                               | ND                    | 1         | Qd                                                                                                                                                                                                                                                                                                                                          | 1               | ND                   | No              | No                 |                             |
| 17  | HYT      | D              | ND               | No             | 1, 2               | 3                               | ND                    | 1, 2, 3   | 32 Q parameters                                                                                                                                                                                                                                                                                                                             | 1, 2, 3, 4, 5   | ND                   | No              | No                 | IHA                         |
| 18  | -        | D              | ND               | No             | ND                 | ND                              | 3-class               | 1, 2, 3   | 32 Q parameters                                                                                                                                                                                                                                                                                                                             | 1, 2, 3, 4, 5   | ND                   | No              | No                 | IHA                         |
| 19  | ERFA     | D              | ND               | No             | ND                 | ND                              | 4-class               | 1, 2, 3   | 32 Q parameters                                                                                                                                                                                                                                                                                                                             | 1, 2, 3, 4, 5   | ND                   | No              | No                 | IHA                         |

| a/a | Acronym | Temporal scale | Length (minimum) | River typology | Information source | Reference conditions estimation | Classification scheme | Component | Indicator                                                                                                                                                                        | Indicator group | Pressures identified | Link to ecology | Biological element | Tool                      |
|-----|---------|----------------|------------------|----------------|--------------------|---------------------------------|-----------------------|-----------|----------------------------------------------------------------------------------------------------------------------------------------------------------------------------------|-----------------|----------------------|-----------------|--------------------|---------------------------|
| 20  | RRI     | ND             | ND               | No             | ND                 | ND                              | ND                    | ND        | storage volume of any reservoir upstream of river reach, the total number of reservoirs upstream of river reach and the natural average discharge volume per year at river reach | ND              | 1, 2                 | No              | No                 | -                         |
| 21  | HIP     | D              | 10-25y           | Yes            | 1, 2               | 1, 3                            | ND                    | 1, 2, 3   | 171 indices                                                                                                                                                                      | 1, 2, 3, 4, 5   | ND                   | No              | No                 | HIT, NATHAT, NJSCT, NJHAT |
| 22  | EDOR    | ND             | ND               | No             | ND                 | ND                              | ND                    | ND        | Reservoir storage capacities and annual discharge (measured or estimated)<br>Reservoir operation (volume of water released and stored)                                           | ND              | ND                   | No              | No                 |                           |
| 23  | -       | D, M           | 10y              | No             | 1                  | ND                              | 2-class               | 2         | Q95                                                                                                                                                                              | 1               | 2, 5                 | No              | No                 | No                        |
| 24  | -       | D              | ND               | Yes            | 1                  | ND                              | 4-class               | 1, 2, 3   | Q95, Q70, Q60                                                                                                                                                                    | 1               | ND                   | No              | No                 | No                        |
| 25  | -       | D              | ND               | Yes            | 1                  | ND                              | 4-class               | 1, 2, 3   | Q95, Q70, Q60                                                                                                                                                                    | 1               | ND                   | Yes             | 1                  | No                        |
| 26  | HMQUI   | D, M           | ND               | No             | ND                 | ND                              | 5-class               | 1, 2      | Q1.5-Q10                                                                                                                                                                         | ND              | 1, 3, 4              | No              | No                 |                           |
| 27  | LIFE    | D              | ND               | No             | 1                  | ND                              | ND                    | ND        | macroinvertebrate abundance                                                                                                                                                      | ND              | ND                   | Yes             | 2                  |                           |
| 28  | CEFI    | ND             | ND               | No             | 1                  | ND                              | ND                    | ND        | macroinvertebrate Relative frequency, Relative abundance, Current velocity optimum value, Indicator weight score                                                                 | ND              | ND                   | Yes             | 2                  |                           |
| 29  | ELF     | ND             | ND               | No             | 1                  | ND                              | 5-class               | ND        | macroinvertebrate Relative richness, Relative abundance                                                                                                                          | ND              | ND                   | Yes             | 2                  |                           |
| 30  | FDC     | D              | ND               | No             | 1                  | ND                              | 8-class               | ND        | ND                                                                                                                                                                               | ND              | ND                   | No              | No                 |                           |
| 31  | HCA     | D              | ND               | No             | 1, 4, 5            | ND                              | ND                    | ND        | ND                                                                                                                                                                               | ND              | 5                    | No              | No                 |                           |
| 32  | FDCI    | H, D           | 20y              | No             | 1, 2               | 1, 3                            | 3-class               | 1, 2, 3   | Qmm, Q95                                                                                                                                                                         | 1, 2, 3, 4, 5   | ND                   | No              | No                 | SAAS v.4.1                |

| a/a | Acronym | Temporal scale | Length (minimum) | River typology | Information source | Reference conditions estimation | Classification scheme | Component | Indicator                                                                                                                                                                                                       | Indicator group | Pressures identified | Link to ecology | Biological element | Tool |
|-----|---------|----------------|------------------|----------------|--------------------|---------------------------------|-----------------------|-----------|-----------------------------------------------------------------------------------------------------------------------------------------------------------------------------------------------------------------|-----------------|----------------------|-----------------|--------------------|------|
| 33  | HAI     | H, D           | 5y               | Yes            | 1, 2               | 2                               | 4-class               | 1, 2, 3   | 39 flow metrics                                                                                                                                                                                                 | 1, 2, 3, 4, 5   | ND                   | No              | No                 |      |
| 34  | HS      | M              | 5y               | Yes            | 1, 2               | 1, 3                            | 4-class               | 1, 2      | Flow permanence, or Mf, Pool permanence, or Mp , Dry channel permanence, or Md , Six-month predictability of zero flow periods, or Sd6, Summer-winter seasonality, or Sws, Equinox-solstice seasonality, or ESs | 1, 2, 3, 4      | ND                   | No              | No                 |      |
| 35  | HAI     | D              | 20y              | No             | 1                  | 1                               | 2-class               | 1         | monthly and annual percentiles 10 and 90                                                                                                                                                                        | 1               | 1, 2, 3              | No              | No                 |      |
| 36  | HP      | H              | ND               | No             | 1                  | ND                              | 3-class               | 1         | HP1, HP2                                                                                                                                                                                                        | 1, 5            | 3                    | No              | No                 |      |
| 37  | HI      | M              | 3y               | No             | 1                  | ND                              | 4-class               | 1         | Froude number (Fr)                                                                                                                                                                                              | 1, 5            | ND                   | No              | No                 |      |
| 38  | DFAI    | ND             | ND               | No             | ND                 | ND                              | ND                    | 1         | ND                                                                                                                                                                                                              | 1, 4            | 1, 3                 | No              | No                 |      |

**Table S3.** Reviewed global hydrological regime alteration assessment methods-Number of primary reference citations

| a/a | Methodology                                                                                      | Acronym  | Scopus | Web of Science | Google Scholar | ResearchGate | Journal metrics | Median | Year | Reference |
|-----|--------------------------------------------------------------------------------------------------|----------|--------|----------------|----------------|--------------|-----------------|--------|------|-----------|
| 1   | Range of Variability Approach                                                                    | RVA      | 475    | 396            | 759            | 257          | 380             | 396    | 1998 | [94]      |
| 2   | Dundee Hydrological Regime Alteration Method                                                     | DHRAM    | 88     | 79             | 154            | 115          | 78              | 88     | 2005 | [101]     |
| 3   | Index of Global Alteration                                                                       | IGA      | 26     | 24             | 37             | 39           | 26              | 26     | 2012 | [103]     |
| 4   | Hydrological Driver Assessment Index                                                             | HAI      | -      | -              | 7              | 11           | -               | 9      | 2007 | [105]     |
| 5   | Histogram Matching Approach                                                                      | HMA      | 75     | 72             | 97             | 93           | 70              | 75     | 2008 | [106]     |
| 6   | Histogram Comparison Approach                                                                    | HCA      | 11     | 12             | 12             | 13           | 11              | 12     | 2017 | [107]     |
| 7   | River Impact Index                                                                               | RI       | 53     | 48             | 71             | 62           | 53              | 53     | 2014 | [108]     |
| 8   | River Disturbance Index                                                                          | RDI      | 105    | 101            | 187            | 158          | 105             | 105    | 2002 | [109]     |
| 9   | Index of Stream Condition                                                                        | ISC      | 243    | 170            | 462            | 328          | 256             | 256    | 1999 | [111]     |
| 10  | Hydrological Disturbance Index                                                                   | HDI      | 62     | 55             | 87             | 87           | 52              | 62     | 2007 | [113]     |
| 11  | Flow Stress Ranking                                                                              | FSR      | 2      | -              | 4              | 3            | -               | 3      | 2011 | [115]     |
| 12  | Sustainable Rivers Hydrology Index                                                               | SR-HI    | 46     | 2              | 164            | 45           | -               | 46     | 2008 | [116]     |
| 13  | Hydrology Sub-Index Tasmanian River Condition Index                                              | HSI-TRCI | 10     | -              | 10             | -            | -               | 10     | 2009 | [117]     |
| 14  | Chinese Hydrology and Water Resources Index                                                      | HD       | 4      | -              | 7              | -            | -               | 6      | 2011 | [118]     |
| 15  | Index of Flow Health                                                                             | IFH      | 5      | -              | 14             | -            | -               | 10     | 2012 | [119]     |
| 16  | Index of Daily Hydrological Alteration                                                           | IDHA     | 33     | 30             | 40             | 36           | 33              | 33     | 2012 | [120]     |
| 17  | Alteration of the HYT (hydrologic year types) order                                              | HYT      | 28     | 26             | 31             | 32           | 24              | 28     | 2015 | [121]     |
| 18  | Eco-index                                                                                        | -        | 20     | 17             | 26             | 23           | 17              | 20     | 2014 | [122]     |
| 19  | Ecological Risk due to Flow Alteration                                                           | ERFA     | 72     | 65             | 100            | 95           | 69              | 72     | 2014 | [100]     |
| 20  | River Regulation Index                                                                           | RRI      | 90     | 88             | 130            | 116          | 90              | 90     | 2014 | [123]     |
| 21  | Hydroecological Integrity Assessment Process                                                     | HIP      | 79     | -              | 162            | 98           | -               | 98     | 2006 | [125]     |
| 22  | Effective Degree of Regulation                                                                   | EDOR     | 183    | 162            | 251            | 218          | 183             | 183    | 2017 | [126]     |
| 23  | The Water Framework Directive (Standards and Classification) Directions (England and Wales) 2015 | -        | 13     | -              | 10             | -            | -               | 12     | 2015 | [128]     |
| 24  | The Water Framework Directive (Classification, Priority Substances and                           | -        | 1      | -              | -              | -            | -               | 1      | 2015 | [129]     |



| a/a | Methodology                                                      | Acronym | Scopus | Web of Science | Google Scholar | ResearchGate | Journal metrics | Median | Year | Reference |
|-----|------------------------------------------------------------------|---------|--------|----------------|----------------|--------------|-----------------|--------|------|-----------|
|     | Shellfish Waters) Regulations<br>(Northern Ireland) 2015         |         |        |                |                |              |                 |        |      |           |
| 25  | The Scotland River Basin District<br>(Standards) Directions 2014 | -       | 5      | -              | 11             | -            | -               | 8      | 2014 | [130]     |
| 26  | Hydro-Morphological Quality Index                                | HMQI    | 42     | -              | 67             | 30           | -               | 42     | 2016 | [131]     |
| 27  | Lotic-invertebrate Index for Flow<br>Evaluation                  | LIFE    | 241    | 235            | 417            | 274          | 215             | 241    | 1999 | [136]     |
| 28  | Canadian Ecological Flow Index                                   | CEFI    | 50     | 49             | 89             | 62           | 43              | 50     | 2011 | [133]     |
| 29  | Hellenic Flow Index                                              | ELF     | 11     | 10             | 17             | 17           | 11              | 11     | 2020 | [135]     |
| 30  | Flow duration curves                                             | FDC     | 385    | 350            | 684            | 562          | 329             | 385    | 1994 | [138]     |
| 31  | Hydrologic Condition Assessment                                  | HCA     | -      | 3              | 16             | -            | -               | 10     | 2000 | [139]     |
| 32  | Flow Duration Curve Index                                        | FDCI    | -      | -              | 10             | -            | -               | 10     | 2013 | [141]     |
| 33  | Hydrologic Alteration Index                                      | HAI     | 25     | 22             | 34             | 29           | 18              | 25     | 2018 | [143]     |
| 34  | Hydrological status                                              | HS      | 96     | 93             | 143            | 133          | 84              | 96     | 2012 | [144]     |
| 35  | Mexican standard-Hydrologic<br>alteration indexes                | HAI     | 10     | 9              | 11             | 15           | 10              | 10     | 2020 | [146]     |
| 36  | Hydropeaking                                                     | HP      | 45     | 42             | 59             | 60           | 43              | 45     | 2015 | [149]     |
| 37  | Hydrology sub-index                                              | HI      | 2      | 2              | 8              | 3            | 2               | 2      | 2021 | [150]     |
| 38  | Dynamic Flow Alteration Indices                                  | DFAI    | 1      | 2              | 4              | 5            | 2               | 396    | 1998 | [151]     |

**Table S4a.** Software tools used in hydrological regime alteration studies

| a/a | Name                                                                                | Acronym     | Country     | Developer                                                                                                                                        | Method associated                                                | Related to WFD |
|-----|-------------------------------------------------------------------------------------|-------------|-------------|--------------------------------------------------------------------------------------------------------------------------------------------------|------------------------------------------------------------------|----------------|
| 01  | Indicators of Hydrologic Alteration                                                 | IHA         | USA         | The Nature Conservancy (TNC)                                                                                                                     | RVA                                                              | No             |
| 02  | Indicators of Hydrologic Alteration in RiverS                                       | IAHRIS      | Spain       | Spanish Ministry of the Environment/ Polytechnic University of Madrid                                                                            | IGA                                                              | Yes            |
| 03  | Hydrologic Index Tool                                                               | HIT         | USA         | USGS                                                                                                                                             | HIP                                                              | No             |
| 04  | National Hydrologic Assessment Tool                                                 | NATHAT      |             |                                                                                                                                                  |                                                                  |                |
| 05  | Flow Health                                                                         | FH          | China       | International WaterCentre, Fluvial Systems Pty and Yorb Pty Ltd                                                                                  | IFH                                                              | No             |
| 06  | River Analysis Package                                                              | RAP         | Australia   | eWater CRC                                                                                                                                       | FDC                                                              | No             |
| 07  | Streamflow Analysis and Assessment Software                                         | SAAS        | Canada      | Ministry of Natural Resources and Forestry of Canada                                                                                             | FDCI                                                             | No             |
| 08  | Temporary Rivers Ecological and Hydrological Status                                 | TREHS       | Europe      | IDAEA-CSIC                                                                                                                                       | HS                                                               | Yes            |
| 09  | Hydrology – flow regime module-FIT                                                  | HYDMOD-FIT  | Switzerland | Federal Office for the Environment (BAFU/OFEV)                                                                                                   | HYDMOD                                                           | No             |
| 10  | Computational Tool for the Characterization of Rapid Fluctuations in Flow and Stage | COSH-Tool   | Norway      | SINTEF Energy                                                                                                                                    | hydropeaking                                                     | No             |
| 11  | Indicators of Short-Term Hydrological Alteration                                    | InSTHAn     | Spain       | Universidad Politécnica de Madrid, Umeå University                                                                                               | hydropeaking                                                     | No             |
| 12  | -                                                                                   | GeoTools    | USA         | Engineering Research Center, Colorado State University                                                                                           | -                                                                | No             |
| 13  | hydrologic alteration and environmental flow assessment                             | Hydra-Eflow | Mexico      | Instituto Interamericano de Tecnología y Ciencias del Agua; Institut national de recherche pour l’agriculture, l’alimentation et l’environnement | IAHRIS/IGA or Mexican standard Hydrologic alteration indexes/HAI | No             |

**Table S4b.** Software tools used in hydrological regime alteration studies (continued)

| a/a | Acronym    | Latest Version | Free/Open source                                                                        | Operating system/<br>programming language<br>(when available) | Site                                                                                                                                                                                                                                                                                                                                                                      | Reference        |
|-----|------------|----------------|-----------------------------------------------------------------------------------------|---------------------------------------------------------------|---------------------------------------------------------------------------------------------------------------------------------------------------------------------------------------------------------------------------------------------------------------------------------------------------------------------------------------------------------------------------|------------------|
| 01  | IHA        | 7.1            | Yes (agreement prior to downloading to the terms and conditions of a license agreement) | Windows executable; R; Python                                 | <a href="https://www.conservationgateway.org/ConservationPractices/Freshwater/EnvironmentalFlows/MethodsandTools/IndicatorsofhydrologicAlteration/Pages/indicators-hydrologic-alt.aspx">https://www.conservationgateway.org/ConservationPractices/Freshwater/EnvironmentalFlows/MethodsandTools/IndicatorsofhydrologicAlteration/Pages/indicators-hydrologic-alt.aspx</a> | [94,152,153,156] |
| 02  | IAHRIS     | 3.0            | Yes                                                                                     | Windows executable                                            | <a href="http://www2.montes.upm.es/dptos/digfa/">http://www2.montes.upm.es/dptos/digfa/</a>                                                                                                                                                                                                                                                                               | [104]            |
| 03  | HIT        | 1.4            | Yes                                                                                     | Windows executable; R; Matlab                                 | <a href="https://www.sciencebase.gov/catalog/item/5387735ee4b0aa26cd7b5461">https://www.sciencebase.gov/catalog/item/5387735ee4b0aa26cd7b5461</a>                                                                                                                                                                                                                         | [22,125,154,155] |
| 04  | NATHAT     | 3.4            |                                                                                         |                                                               |                                                                                                                                                                                                                                                                                                                                                                           |                  |
| 05  | FH         | 3.0            | Yes                                                                                     | Windows executable                                            | <a href="https://www.watercentre.org/resources/flow-health-hydrology-assessment-tool/">https://www.watercentre.org/resources/flow-health-hydrology-assessment-tool/</a>                                                                                                                                                                                                   | [119]            |
| 06  | RAP        | 3.0.8          | Yes (registration required)                                                             | Windows executable                                            | <a href="https://toolkit.ewater.org.au/Tools/RAP">https://toolkit.ewater.org.au/Tools/RAP</a>                                                                                                                                                                                                                                                                             | [157]            |
| 07  | SAAS       | 4.1            | Yes (password send after personal communication)                                        | Windows executable                                            | <a href="https://people.trentu.ca/~rmetcalfe/SAAS.html">https://people.trentu.ca/~rmetcalfe/SAAS.html</a>                                                                                                                                                                                                                                                                 | [140]            |
| 08  | TREHS      | -              | Yes (email required)                                                                    | Windows executable                                            | <a href="http://www.lifettrivers.eu/products/trehs-software/">http://www.lifettrivers.eu/products/trehs-software/</a>                                                                                                                                                                                                                                                     | [158,159]        |
| 09  | HYDMOD-FIT | 1.1.0.1        | Yes                                                                                     | Windows executable; .NET Framework; Microsoft Office          | <a href="https://modul-stufen-konzept.ch/en/hydrology/">https://modul-stufen-konzept.ch/en/hydrology/</a>                                                                                                                                                                                                                                                                 | [89]             |
| 10  | COSH-Tool  | 2016           | Yes (after agreement with SINTEF Energy Research)                                       | Windows executable/Python                                     | <a href="https://www.fithydro.wiki/index.php/COSH-tool">https://www.fithydro.wiki/index.php/COSH-tool</a>                                                                                                                                                                                                                                                                 | [160]            |
| 11  | InSTHAn    | -              | No                                                                                      | Windows executable, Linux, Macintosh/Matlab                   | -                                                                                                                                                                                                                                                                                                                                                                         | [161]            |
| 12  | GeoTools   | 4.0            | Yes                                                                                     | Windows executable/<br>Microsoft Office/Visual Basic          | <a href="http://www.engr.colostate.edu/~bbledsoe/GeoTool/">http://www.engr.colostate.edu/~bbledsoe/GeoTool/</a>                                                                                                                                                                                                                                                           | [162]            |

---

|    |             |     |     |                                       |                                                                                                                                                                 |       |
|----|-------------|-----|-----|---------------------------------------|-----------------------------------------------------------------------------------------------------------------------------------------------------------------|-------|
| 13 | Hydra-Eflow | 1.0 | Yes | Windows executable/<br>Matlab Runtime | <a href="https://drive.google.com/drive/folders/1nmbrRRH-YUaYN-XgjRbqE9730-gKebIH">https://drive.google.com/drive/folders/1nmbrRRH-YUaYN-XgjRbqE9730-gKebIH</a> | [163] |
|----|-------------|-----|-----|---------------------------------------|-----------------------------------------------------------------------------------------------------------------------------------------------------------------|-------|

---
